# Supplementary material for: Direct measurement of fight or flight behavior in a beetle reveals individual variation and the influence of parasitism
Source: PLoS One. 2019 May 22;14(5):e0216387. doi: 10.1371/journal.pone.0216387 (PMC6530861; doi:10.1371/journal.pone.0216387)
Supplement: S3 File — All raw data used in the analyses of the project. (XLSX) [file pone.0216387.s003.xlsx]

## Sheet: Sheet1
Expt	Beetle ID	Beetle Mass (g)	Housing Treatment	Nematode score	Parasitized (0,1)	Beetle Sex	Beetle fight Score	Beetle Squeak Rate
1	C03	2	Control	2	1	M	16	67
2	C42	2.11	Control	0	0	F	11	80
2	C43	1.65	Control	3	1	F	12	77
2	C44	1.77	Control	0	0	F	18	73
2	C45	1.64	Control	3	1	F	18	28
2	C46	2.03	Control	0	0	F	16	40
2	C47	1.8	Control	3	1	F	9	93
2	C48	1.67	Control	0	0	F	12	83
2	C49	1.71	Control	1	1	F	15	47
2	C50	1.95	Control	1	1	F	13	20
2	C51	1.48	Control	0	0	F	16	49
2	C52	1.82	Control	0	0	F	14	35
2	C53	1.58	Control	3	1	F	9	47
2	C54	2.07	Control	3	1	F	16	88
2	C55	1.84	Control	1	1	M	23	27
2	C56	2.05	Control	1	1	F	14	32
2	C57	1.65	Control	2	1	M	15	69
2	C58	1.93	Control	0	0	F	14	30
2	C59	1.93	Control	0	0	F	18	35
2	C60	1.38	Control	2	1	M	14	52
2	C61	1.88	Control	0	0	F	15	26
2	C62	2.2	Control	3	1	F	21	0
2	C63	1.67	Control	0	0	M	13	21
2	C64	1.7	Control	2	1	F	15	72
2	C65	1.67	Control	2	1	M	22	46
2	C66	1.83	Control	1	1	M	12	53
2	C68	1.72	Control	0	0	F	14	18
2	C69	1.74	Control	0	0	F	23	42
2	C70	2.09	Control	0	0	F	20	83
2	C71	2	Control	1	1	F	12	33
2	C72	1.77	Control	2	1	F	20	82
2	C73	1.65	Control	0	0	M	19	36
2	C74	1.84	Control	0	0	F	20	72
2	C75	1.74	Control	0	0	F	15	15
2	C76	1.96	Control	0	0	F	18	29
1	CO1	1.26	Control	2	1	M	11	17
1	CO10	1.48	Control	3	1	F	17	95
1	CO11	1.52	Control	2	1	F	14	22
1	CO12	1.73	Control	2	1	F	17	13
1	CO13	1.64	Control	1	1	M	15	29
1	CO14	1.81	Control	1	1	M	14	46
1	CO15	1.62	Control	2	1	F	17	7
1	CO16	1.8	Control	3	1	F	13	3
1	CO17	2.01	Control	3	1	F	16
1	CO18	1.35	Control	0	0	M	15	68
1	CO19	1.75	Control	3	1	F	15	38
1	CO2	1.78	Control	0	0	M	18	8
1	CO20	1.13	Control	2	1	F	13	98
1	CO21	1.68	Control	3	1	F	15	72
1	CO22	2	Control	0	0	M	21	60
1	CO23	1.63	Control	0	0	F	15	88
1	CO24	1.86	Control	2	1	M	13	44
1	CO25	1.53	Control	2	1	M	14	4
1	CO26	1.52	Control	3	1	F	18	46
1	CO27	0.91	Control	2	1	M	13	68
1	CO28	1.64	Control	0	0	F	20	25
1	CO29	1.45	Control	1	1	F	13	105
1	CO30	1.6	Control	3	1	M	12	54
1	CO31	1.57	Control	3	1	F	20	119
1	CO32	1.86	Control	0	0	F	19	129
1	CO33	1.88	Control	0	0	F	21	50
1	CO34	2.29	Control	3	1	F	24	31
1	CO35	1.59	Control	1	1	F	14	3
1	CO36	1.49	Control	1	1	F	10	13
1	CO37	1.46	Control	2	1	F	11	46
1	CO4	1.8	Control	2	1	F	12	33
1	CO5	1.63	Control	3	1	F	15	15
1	CO6	1.61	Control	0	0	F	19
1	CO7	2.09	Control	0	0	M	17	7
1	CO8	1.49	Control	1	1	M	16	41
1	CO9	1.71	Control	1	1	M	13	3
2	L12	1.7	Stress	0	0	F	21	78
2	L13	1.84	Stress	2	1	M	10	89
2	L14	1.55	Stress	3	1	F	14	43
2	L15	1.86	Stress	0	0	F	17	96
2	L16	1.39	Stress	1	1	M	7	137
2	L17	1.57	Stress	3	1	F	20	57
2	L18	2.11	Stress	1	1	F	11	64
2	L19	2.01	Stress	3	1	F	18	79
2	L2	1.71	Stress	1	1	F
2	L21	1.67	Stress	0	0	F	8	63
2	L22	1.65	Stress	1	1	F	16	103
2	L23	1.39	Stress	0	0	M	4	87
2	L24	1.81	Stress	0	0	F	12	0
2	L25	1.73	Stress	3	1	F	8	111
2	L26	1.5	Stress	1	1	F	19	87
2	L28	1.55	Stress	0	0	M	19	53
2	L29	1.71	Stress	3	1	F	18	10
2	L30	1.66	Stress	0	0	M	20	77
2	L31	1.93	Stress	0	0	F	12	39
2	L32	1.42	Stress	3	1	M	14	30
2	L33	1.84	Stress	0	0	F	21	24
2	L35	1.69	Stress	2	1	M	17
2	L36	1.52	Stress	3	1	F	12	111
2	L37	1.7	Stress	0	0	F	7	82
2	L38	1.97	Stress	0	0	F	13	88
2	L39	1.65	Stress	2	1	F	11	70
2	L4	1.71	Stress	3	1	F	10	25
2	L40	2.16	Stress	0	0	F	22	69
2	L5	1.27	Stress	0	0	F	17	23
2	L6	1.9	Stress	0	0	F	22	140
2	L7	2.18	Stress	3	1	F	19	88
2	L8	1.66	Stress	0	0	M	19	68
2	L9	1.67	Stress	0	0	M	15	90
1	LI1	1.24	Stress	3	1	F	13	176
1	LI10	1.46	Stress	0	0	M	21	82
1	LI11	1.84	Stress	3	1	M	13	62
1	LI12	1.4	Stress	3	1	F	8	103
1	LI13	1.46	Stress	2	1	M	9	34
1	LI14	1.53	Stress	0	0	F	16	47
1	LI15	1.75	Stress	3	1	F	19	28
1	LI16	1.6	Stress	3	1	F	14	107
1	LI17	1.75	Stress	3	1	F	11	84
1	LI18	1.33	Stress	3	1	F	18	90
1	LI19	1.43	Stress	0	0	F	20	82
1	LI2	1.71	Stress	3	1	F	17	163
1	LI20	1.78	Stress	1	1	M	10	49
1	LI21	1.92	Stress	3	1	F	14	24
1	LI22	1.13	Stress	1	1	M	16	75
1	LI23	1.83	Stress	0	0	F	17	98
1	LI24	1.37	Stress	0	0	M	5	93
1	LI25	1.73	Stress	2	1	F	14	110
1	LI26	1.42	Stress	1	1	M	16	74
1	LI27	1.76	Stress	1	1	F	18	119
1	LI28	1.45	Stress	2	1	M	16	100
1	LI29	1.49	Stress	1	1	M	10	15
1	LI3	1.84	Stress	1	1	M	11	26
1	LI30	1.42	Stress	2	1	M	16	58
1	LI31	1.78	Stress	2	1	F	14	75
1	LI32	1.8	Stress	1	1	F	14	93
1	LI33	1.83	Stress	2	1	M	18	50
1	LI34	1.61	Stress	0	0	F	14	84
1	LI35	1.41	Stress	1	1	M	19	5
1	LI36	1.31	Stress	2	1	F	11	54
1	LI4	1.77	Stress	3	1	F	15	49
1	LI5	1.71	Stress	3	1	F	20	68
1	LI6	1.44	Stress	3	1	F	6	5
1	LI7	1.73	Stress	3	1	F	16	76
1	LI8	1.63	Stress	1	1	M	7	58
1	LI9	1.38	Stress	2	1	M	20	2
